# Supplementary material for: Ice-regenerated flame retardant and robust film ofBombyx morisilk fibroin and POSS nano-cages
Source: Royal Society of Chemistry journal article supplement (doi:10.1039/c7ra13708g), 2018-01-01
Supplement: c7ra13708g1.pdf [file c7ra13708g1.pdf]

## Supplementary data

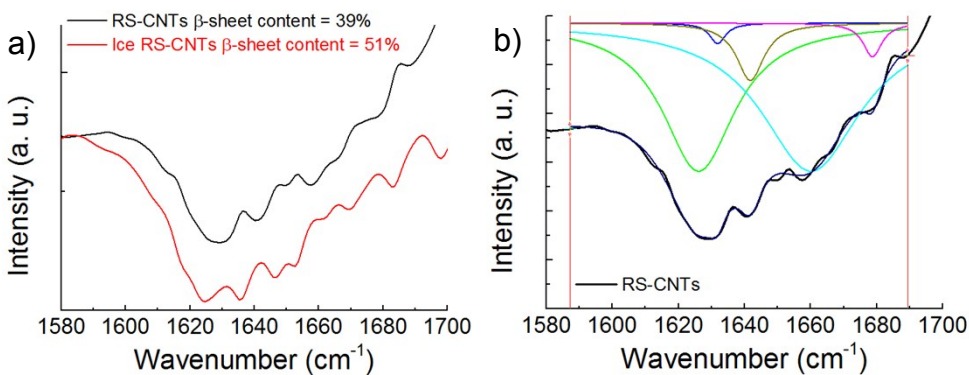

Figure S1. (a) Transmittance spectra of RS-CNTs and icing RS-CNTs films, amide I, obtained after (b) Fourier deconvolution. The heavy line represents the deduced transmittance band.

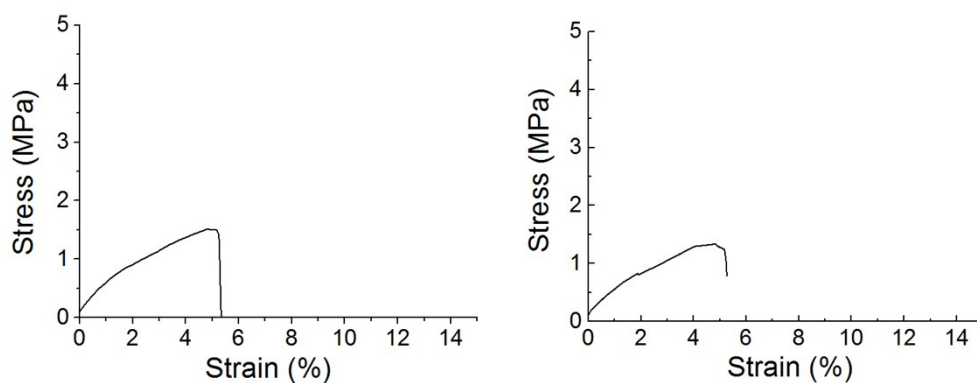

Figure S2. Tensile stress-strain average curves of (a) RS-CNT and (b) RS-CNTs films after icing.

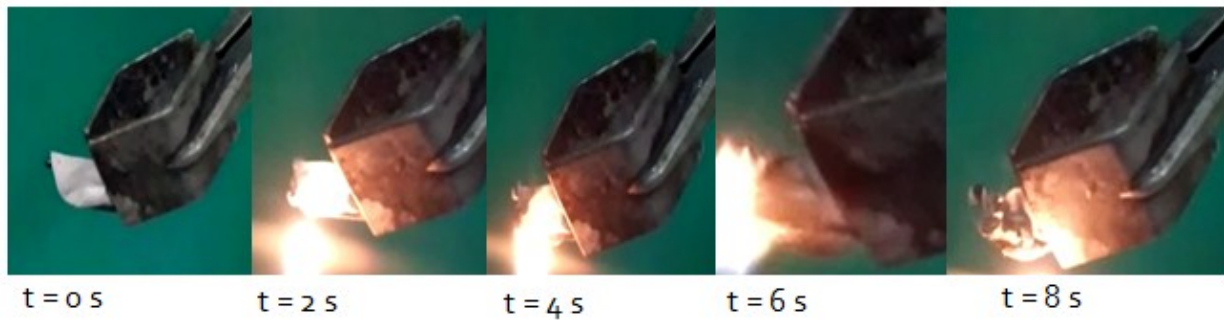

Figure S3. Combustion process of ice RS-CNTs film. The introducing of CNTs into RS enhances the flame propagation and produces severe dripping during the combustion process.
